# Supplementary material for: Understanding Barriers to Participation in Cost-Share Programs For Pollinator Conservation by Wisconsin (USA) Cranberry Growers
Source: Insects. 2017 Aug 1;8(3):79. doi: 10.3390/insects8030079 (PMC5620699; doi:10.3390/insects8030079)
Supplement: Supplementary file 1 [file insects-08-00079-s001.pdf]

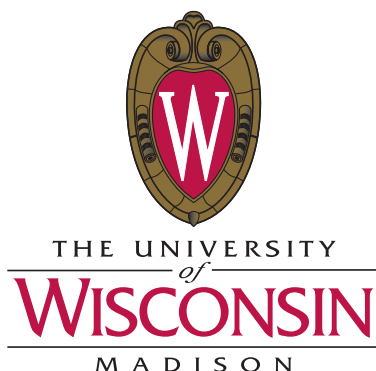

## Cranberry Grower Survey

**This study is being conducted in order to understand how cranberry growers regard on-farm conservation programs in general and pollinator conservation programs in particular.**

**Your answers will be kept confidential, and not released in a way that would allow you to be identified.**

**1. Are you currently acting as the primary farm operator for your cranberry farm? Acting as the primary farm operator would include handling day to day operations and making decisions regarding farming practices for cranberry production done on your farm.**

☐ Yes → **Go to question 2**

☐ No  
↓

**We would appreciate your assistance in passing this survey on to the person who is the primary farm operator for your Cranberry farm.**

**If you are unable to pass the survey on to that person, please make note of that here and return the blank survey in the enclosed postage paid envelope.**

**Thank you!**

## MANAGEMENT OF CRANBERRY MARSHES

*This section is about current management practices and where you obtain information on management practices.*

**2. Within the past 5 years, if you ever irrigated, in general, what time of day did you irrigate your cranberry beds? (Check all that apply)**

- ☐ Before 8:00 a.m.
- ☐ Between 8:00 a.m. and 3:00 p.m.
- ☐ Between 3:00 p.m. and 7:00 p.m.
- ☐ After 7:00 p.m.
- ☐ I never irrigated over the past 5 years

**3. Within the past 5 years, if you applied any of the following substances, what time of day did you usually apply them to your cranberry beds? (Check all that apply)**

|                | Before<br>8:00 a.m.      | Between<br>8:00 a.m.<br>and 3:00<br>p.m. | Between<br>3:00 p.m.<br>and 7:00<br>p.m. | After 7:00<br>p.m.       | I did <u>not</u><br>apply in<br>past 5<br>years |
|----------------|--------------------------|------------------------------------------|------------------------------------------|--------------------------|-------------------------------------------------|
| a. Insecticide | <input type="checkbox"/> | <input type="checkbox"/>                 | <input type="checkbox"/>                 | <input type="checkbox"/> | <input type="checkbox"/>                        |
| b. Herbicide   | <input type="checkbox"/> | <input type="checkbox"/>                 | <input type="checkbox"/>                 | <input type="checkbox"/> | <input type="checkbox"/>                        |
| c. Fungicide   | <input type="checkbox"/> | <input type="checkbox"/>                 | <input type="checkbox"/>                 | <input type="checkbox"/> | <input type="checkbox"/>                        |

**4. Within the past 5 years, if you applied any of the following substances, how many applications, on average, did you spray per year of each of the following? If you did not spray at all, please write '0' for that substance.**

|                                                | Number of<br>applications<br>per year |
|------------------------------------------------|---------------------------------------|
| a. Insecticide                                 | <input type="text"/>                  |
| b. Herbicide                                   | <input type="text"/>                  |
| c. Fungicide                                   | <input type="text"/>                  |
| d. Other, please describe <input type="text"/> | <input type="text"/>                  |

**5. Within the past 5 years, did you ever use the following types of insecticide products on your cranberry beds?**

|                                                              | Yes                   | No                    |
|--------------------------------------------------------------|-----------------------|-----------------------|
| a. Insect growth regulators such as Confirm or Intrepid      | <input type="radio"/> | <input type="radio"/> |
| b. Neonicotinoids such as Assail                             | <input type="radio"/> | <input type="radio"/> |
| c. Organophosphates such as Diazinon or Lorsban              | <input type="radio"/> | <input type="radio"/> |
| d. Some other products, please describe <input type="text"/> | <input type="radio"/> | <input type="radio"/> |

**6. Is your farm certified organic?**

- ☐ Yes  
☐ No

**7. Do you hire a scout to monitor for insect pests?**

- ☐ Yes  
☐ No

**8. Within the past 5 years, which of the following methods did you use to determine when to spray for insect pests? Did you use...**

|                                                               | Yes                   | No                    |
|---------------------------------------------------------------|-----------------------|-----------------------|
| a. ...a calendar schedule?                                    | <input type="radio"/> | <input type="radio"/> |
| b. ...scout reports?                                          | <input type="radio"/> | <input type="radio"/> |
| c. ...some other method? please describe <input type="text"/> | <input type="radio"/> | <input type="radio"/> |

**9. Within the past 5 years, what insect pest management strategies did you use in addition to or instead of insecticides? Did you use...**

|                                                                 | Yes                   | No                    |
|-----------------------------------------------------------------|-----------------------|-----------------------|
| a. ...flooding?                                                 | <input type="radio"/> | <input type="radio"/> |
| b. ...biological control?                                       | <input type="radio"/> | <input type="radio"/> |
| c. ...sanding?                                                  | <input type="radio"/> | <input type="radio"/> |
| d. ...some other strategy? please describe <input type="text"/> | <input type="radio"/> | <input type="radio"/> |

10. Below is a list of sources of information about pest, nutrient, water, frost and other management practices. For each source of information, please indicate if you have used that source in the past, if you are using it now, if you want to use it in the future, or if you have NEVER used that source of information, and would not want to in the future. (Check all that apply)

|                                                          | Used it in the past      | Use it now               | Want to use it in the future | Never used it and will not in the future |
|----------------------------------------------------------|--------------------------|--------------------------|------------------------------|------------------------------------------|
| a. Crop Scout                                            | <input type="checkbox"/> | <input type="checkbox"/> | <input type="checkbox"/>     | <input type="checkbox"/>                 |
| b. University Extension Agent                            | <input type="checkbox"/> | <input type="checkbox"/> | <input type="checkbox"/>     | <input type="checkbox"/>                 |
| c. Natural Resources Conservation Service (NRCS) Staff   | <input type="checkbox"/> | <input type="checkbox"/> | <input type="checkbox"/>     | <input type="checkbox"/>                 |
| d. Neighbor or friend                                    | <input type="checkbox"/> | <input type="checkbox"/> | <input type="checkbox"/>     | <input type="checkbox"/>                 |
| e. Cranberry School                                      | <input type="checkbox"/> | <input type="checkbox"/> | <input type="checkbox"/>     | <input type="checkbox"/>                 |
| f. Information hotline (phone)                           | <input type="checkbox"/> | <input type="checkbox"/> | <input type="checkbox"/>     | <input type="checkbox"/>                 |
| g. Newsletter (paper)                                    | <input type="checkbox"/> | <input type="checkbox"/> | <input type="checkbox"/>     | <input type="checkbox"/>                 |
| h. Email listserv                                        | <input type="checkbox"/> | <input type="checkbox"/> | <input type="checkbox"/>     | <input type="checkbox"/>                 |
| i. Text message (automatic alerts)                       | <input type="checkbox"/> | <input type="checkbox"/> | <input type="checkbox"/>     | <input type="checkbox"/>                 |
| j. Social networking site (Facebook, Twitter)            | <input type="checkbox"/> | <input type="checkbox"/> | <input type="checkbox"/>     | <input type="checkbox"/>                 |
| k. Website (please list below) ↴<br><input type="text"/> | <input type="checkbox"/> | <input type="checkbox"/> | <input type="checkbox"/>     | <input type="checkbox"/>                 |
| l. Other (please list below) ↴<br><input type="text"/>   | <input type="checkbox"/> | <input type="checkbox"/> | <input type="checkbox"/>     | <input type="checkbox"/>                 |

### POLLINATORS - WILD AND MANAGED

*This section is about your current pollination practices and your awareness about wild bees and pollinator habitat.*

11. Do you currently rent honey bees for pollination?

- ☐ Yes  
☒ No → Go to question 13

12. How many hives per acre?

hives

13. Have you ever rented honey bees for pollination in the past?

- ☐ Yes  
☐ No

**14. Do you use commercial bumble bees for pollination?**

- ☐ Yes  
☐ No → Go to question 16

**15. How many hives per acre?**

hives

**16. Have you noticed a change in the *availability* of honey bee hives in the past 5 years?**

- ☐ Yes → Please explain  
☐ No

**17. Have you observed a change in the *quality* of rented honey bee hives in the past 5 years?**

- ☐ Yes → Please explain  
☐ No

**18. How familiar are you with Colony Collapse Disorder (CCD)?**

- ☐ Not at all familiar  
☐ Slightly familiar  
☐ Somewhat familiar  
☐ Very familiar  
☐ Extremely familiar

**19. Can you distinguish between wild bees and honey bees?**

- ☐ Yes  
☐ No

**20. How important do you think honey bees are for cranberry pollination?**

- ☐ Not at all important  
☐ Slightly important  
☐ Somewhat important  
☐ Very important  
☐ Extremely important

**21. Are you aware of any wild bees on your property?**

- ☐ Yes  
☐ No

22. Do you actively manage *habitat* to encourage wild bees on your property?

☐ Yes → Please explain

☐ No → Go to question 24

23. If you do manage habitat for wild bees, did you receive cost-share funding to do this?

☐ Yes → Through whom?

☐ No

24. Are you aware of cost-share programs for establishing pollinator habitat?

☐ Yes

☐ No

25. Have you altered your management *in any way* to encourage wild bees on your property?

☐ Yes → Please explain

☐ No

26. How important are each of the following in your decision about whether or not to manage for wild bees?

|                                                    | Not at all            | Slightly              | Somewhat              | Very                  | Extremely             | Not applicable        |
|----------------------------------------------------|-----------------------|-----------------------|-----------------------|-----------------------|-----------------------|-----------------------|
| a. Financial commitment                            | <input type="radio"/> |
| b. Time commitment                                 | <input type="radio"/> |
| c. Space requirements                              | <input type="radio"/> |
| d. Availability of cost share programs             | <input type="radio"/> |
| e. Availability of technical support               | <input type="radio"/> |
| f. Environmental stewardship                       | <input type="radio"/> |
| g. Encouragement of neighbor or friend             | <input type="radio"/> |
| h. Knowledge about wild bees                       | <input type="radio"/> |
| i. Knowledge about pollinator habitat              | <input type="radio"/> |
| j. Perceived weed problems from pollinator habitat | <input type="radio"/> |
| k. Perceived pest problems from pollinator habitat | <input type="radio"/> |
| l. Beauty or landscaping                           | <input type="radio"/> |
| m. Importance of pollination for cranberries       | <input type="radio"/> |
| n. Other (please explain) ↓                        | <input type="radio"/> |

**27. If you do not currently manage for wild bees on your property would you be interested in managing for wild bees in the future?**

☐ Yes

☐ No

**28. Which of the following would be useful to you?**

|                                                                          | Useful                | Not useful            |
|--------------------------------------------------------------------------|-----------------------|-----------------------|
| a. Field day demonstration of a pollinator habitat project               | <input type="radio"/> | <input type="radio"/> |
| b. Informational pamphlet about wild bees                                | <input type="radio"/> | <input type="radio"/> |
| c. Field guide to wild bees                                              | <input type="radio"/> | <input type="radio"/> |
| d. Informational pamphlet about USDA cost-sharing programs for wild bees | <input type="radio"/> | <input type="radio"/> |
| e. Website about wild bees                                               | <input type="radio"/> | <input type="radio"/> |
| f. Website about pollinator habitat                                      | <input type="radio"/> | <input type="radio"/> |
| g. Website about USDA cost-sharing programs for wild bees                | <input type="radio"/> | <input type="radio"/> |
| h. Other (please explain) <input type="text"/>                           | <input type="radio"/> | <input type="radio"/> |

### ON-FARM CONSERVATION PROGRAMS

*The next questions are about on-farm conservation programs in general.*

**29. Do you currently manage habitat (prairie plantings, woodlots, wetland, etc.) for the specific goal of protecting wildlife (birds, beneficial insects, mammals, etc.)?**

☐ Yes

☐ No → Go to question 32

**30. If yes, do you receive cost-share funding to support these conservation management activities?**

☐ Yes

☐ No → Go to question 32

**31. Through whom do you receive cost-share funding to support these conservation management activities?**

**32. How important are the following in your decision whether or not to manage habitat for wildlife such as birds, beneficial insects, and mammals?**

|                                                  | Not at all            | Slightly              | Somewhat              | Very                  | Extremely             | Not applicable        |
|--------------------------------------------------|-----------------------|-----------------------|-----------------------|-----------------------|-----------------------|-----------------------|
| a. Financial commitment                          | <input type="radio"/> |
| b. Time commitment                               | <input type="radio"/> |
| c. Space requirements                            | <input type="radio"/> |
| d. Availability of cost share programs           | <input type="radio"/> |
| e. Availability of technical support             | <input type="radio"/> |
| f. Environmental stewardship                     | <input type="radio"/> |
| g. Encouragement of neighbor or friend           | <input type="radio"/> |
| h. Knowledge of wildlife                         | <input type="radio"/> |
| i. Knowledge of wildlife habitat                 | <input type="radio"/> |
| j. Perceived weed problems from wildlife habitat | <input type="radio"/> |
| k. Perceived pest problems from wildlife habitat | <input type="radio"/> |
| l. Beauty or landscaping                         | <input type="radio"/> |
| m. Recreation, such as hunting or hiking         | <input type="radio"/> |
| n. Other (please explain) ↴                      | <input type="radio"/> |

**33. Do you or have you ever participated in any of the following United States Department of Agriculture (USDA)-sponsored conservation incentive programs? (*Check all that apply.*)**

- ☐ Conservation Reserve Program (CRP)
- ☐ Conservation Reserve Enhancement Program (CREP)
- ☐ Environmental Quality Incentives Program (EQIP)
- ☐ Wildlife Habitat Incentives Program (WHIP)
- ☐ Other, please explain

**34. Do you currently participate in the Whole Farm Planning Incentives Program (WFPIP)?**

- ☐ Yes
- ☐ No

**35. Do you currently participate in any programs that address the following environmental/conservation issues? (Check all that apply.)**

- ☐ Nutrient management
- ☐ Pest management
- ☐ Water quality and conservation
- ☐ Soil conservation

**36. In the future, how likely are you to participate in a USDA-sponsored conservation incentive program?**

- ☐ Extremely unlikely
- ☐ Very unlikely
- ☐ Somewhat unlikely
- ☐ Not sure
- ☐ Somewhat likely
- ☐ Very likely
- ☐ Extremely likely

**37. In the future, how likely are you to participate in a non-USDA-sponsored conservation incentive program?**

- ☐ Extremely unlikely
- ☐ Very unlikely
- ☐ Somewhat unlikely
- ☐ Not sure
- ☐ Somewhat likely
- ☐ Very likely
- ☐ Extremely likely

**38. How important are the following in your decision whether or not to participate in a conservation incentive program?**

|                                                                                                               | Not at all            | Slightly              | Somewhat              | Very                  | Extremely             | Not applicable        |
|---------------------------------------------------------------------------------------------------------------|-----------------------|-----------------------|-----------------------|-----------------------|-----------------------|-----------------------|
| a. Financial commitment                                                                                       | <input type="radio"/> |
| b. Time commitment                                                                                            | <input type="radio"/> |
| c. Availability of cost share programs                                                                        | <input type="radio"/> |
| d. Availability of technical support                                                                          | <input type="radio"/> |
| e. Environmental stewardship                                                                                  | <input type="radio"/> |
| f. Encouragement of neighbor or friend                                                                        | <input type="radio"/> |
| g. Awareness of programs                                                                                      | <input type="radio"/> |
| h. General interest                                                                                           | <input type="radio"/> |
| i. Amount of paperwork                                                                                        | <input type="radio"/> |
| j. Government sponsorship of program                                                                          | <input type="radio"/> |
| k. Other (please explain) 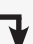 | <input type="radio"/> |
| <div></div>                                                                                                   |                       |                       |                       |                       |                       |                       |

**39. Would you be interested in participating in a cost-share conservation program to enhance wild bees through the planting of pollinator habitat on your property?**

- ☐ Yes  
☐ No

**40. Do you know who your NRCS officer or representative is?**

- ☐ Yes  
☐ No

**41. Are you comfortable working with or getting information from your NRCS officer or representative?**

- ☐ Yes  
☐ No

## YOUR BACKGROUND

*These last questions are about you.*

### 42. What is your age?

- ☐ Less than 25 years old
- ☐ 25-34
- ☐ 35-44
- ☐ 45-54
- ☐ 55-64
- ☐ 65 or older

### 43. What is your gender?

- ☐ Male
- ☐ Female

### 44. In which county (or counties) do you grow cranberries?

### 45. How many acres of cranberries do you manage?

- ☐ Less than 50 acres
- ☐ 50 – 149 acres
- ☐ 150 – 300 acres
- ☐ Over 300 acres

### 46. How many total acres do you own or manage, including all cranberry and non-cranberry?

 acres

### 47. How long have YOU been growing cranberries?

 years

**48. How long has YOUR FAMILY been growing cranberries?**

years

**49. Do you regularly attend Cranberry School?**

- ☐ Yes  
☐ No

**50. Is growing cranberries your primary source of income?**

- ☐ Yes  
☐ No

**THANK YOU for your participation!**

If you have any questions or concerns, please contact Hannah Gaines by phone (774-392-0498) or email (hgaines@gmail.com).

If there is anything else you would like us to know, please use the space below to do so.
